# Supplementary material for: Surgical Outcomes of Video-Assisted versus Open Pneumonectomy for Lung Cancer: A Real-World Study
Source: MDPI journal article supplement (doi:10.3390/cancers14225683), 2022-11-19
Supplement: s1 [file s1]

**Supplementary Table S1.** Baseline characteristics between open and VATS pneumonectomy group patients before propensity-score matching.

| Characteristic               |        | Total<br>N=583 | Open<br>n=478(82.0) | VATS<br>n=105(18.0) | <i>p</i> |
|------------------------------|--------|----------------|---------------------|---------------------|----------|
|                              |        | No. (%)        | No. (%)             | No. (%)             |          |
| Sex                          | Male   | 517(88.7)      | 428(89.5)           | 89(84.8)            | .174     |
|                              | Female | 66(11.3)       | 50(10.5)            | 16(15.2)            |          |
| Age, years                   |        | 59.7±8.0       | 59.6±7.8            | 60.5±8.8            | .273     |
| % Predicted FEV <sub>1</sub> |        | 79.6±15.0      | 79.3±14.8           | 80.9±15.7           | .321     |
| % Predicted DLCO             |        | 85.5±19.2      | 86.1±19.5           | 82.9±18.0           | .121     |
| Neo-ACT                      |        | 65(11.1)       | 58(12.1)            | 7(6.7)              | .124     |
| Comorbidity                  |        | 76(13.0)       | 66(13.8)            | 10(9.5)             | .238     |
| Pathology                    | SCC    | 410(70.3)      | 340(71.1)           | 70(66.7)            | .664     |
|                              | ADE    | 95(16.3)       | 76(15.9)            | 19(18.1)            |          |
|                              | Others | 78(13.4)       | 62(13.0)            | 16(15.2)            |          |
| cT stage                     | 2      | 341(58.5)      | 276(57.7)           | 65(61.9)            | .433     |
|                              | 3/4    | 242(41.5)      | 202(42.3)           | 40(38.1)            |          |
| cN stage                     | 0      | 125(21.4)      | 101(21.1)           | 24(22.9)            | .696     |
|                              | 1/2    | 458(78.6)      | 377(78.9)           | 81(77.1)            |          |
| pT stage                     | 2      | 311(53.3)      | 248(51.9)           | 63(60.0)            | .131     |
|                              | 3/4    | 272(46.7)      | 230(48.1)           | 42(40.0)            |          |
| pN stage                     | 0      | 108(18.5)      | 86(18.0)            | 22(21.0)            | .479     |
|                              | 1/2    | 475(81.5)      | 392(82.0)           | 83(79.0)            |          |
| pM stage                     | 0      | 576(98.8)      | 471(98.5)           | 105(100)            | 1.000    |
|                              | 1      | 7(1.2)         | 7(1.5)              | 0                   |          |
| pTNM stage                   | I      | 54(9.3)        | 38(7.9)             | 16(15.2)            | .020     |
|                              | II-IV  | 529(90.7)      | 440(92.1)           | 89(84.8)            |          |
| Laterality                   | Right  | 105(18.0)      | 77(16.1)            | 28(26.7)            | .016     |
|                              | Left   | 478(82.0)      | 401(83.9)           | 77(73.3)            |          |

Abbreviations: FEV<sub>1</sub>= forced expiratory volume in 1s, DLCO= diffusion capacity of lung for carbon monoxide, Neo-ACT=neoadjuvant chemotherapy, SCC=squamous cell carcinoma, ADE=adenocarcinoma,  $\chi^2$  test was calculated from logistic regression model stratified by trail. *P* value is for the comparison between Open and VATS group.

**Supplementary Table S2.** Baseline characteristics between open and VATS pneumonectomy patients after propensity-score matching.

| Characteristic               |        | Total<br>N=203 | Open<br>n=132 | VATS<br>n=71 | <i>p</i> |
|------------------------------|--------|----------------|---------------|--------------|----------|
|                              |        | No. (%)        | No. (%)       | No. (%)      |          |
| Sex                          | Male   | 177(87.2)      | 115(87.1)     | 62(87.3)     | .967     |
|                              | Female | 26(12.8)       | 17(12.9)      | 9(12.7)      |          |
| Age, years                   |        | 59.7±7.7       | 59.9±7.3      | 59.4±8.4     | .638     |
| % Predicted FEV <sub>1</sub> |        | 80.9±14.3      | 79.7±14.0     | 83.1±14.8    | .107     |
| % Predicted DLCO             |        | 86.6±17.9      | 87.7±18.4     | 84.5±17.1    | .225     |
| Neo-ACT                      |        | 11(5.4)        | 7(5.3)        | 4(5.6)       | 1.000    |
| Comorbidity                  |        | 25(12.3)       | 16(12.1)      | 9(12.7)      | .909     |
| Pathology                    | SCC    | 138(68.0)      | 90(68.2)      | 48(67.6)     | .308     |
|                              | ADE    | 38(18.7)       | 27(20.4)      | 11(15.5)     |          |
|                              | Others | 27(13.3)       | 15(11.4)      | 12(16.9)     |          |
| cT stage                     | 2      | 127(62.6)      | 83(62.9)      | 44(62.0)     | .899     |
|                              | 3/4    | 76(37.4)       | 49(37.1)      | 27(38.0)     |          |
| cN stage                     | 0      | 41(20.2)       | 29(22.0)      | 12(16.9)     | .391     |
|                              | 1/2    | 162(79.8)      | 103(78.0)     | 59(83.1)     |          |
| pT stage                     | 2      | 125(61.6)      | 82(62.1)      | 43(60.6)     | .828     |
|                              | 3/4    | 78(38.4)       | 50(37.9)      | 28(39.4)     |          |
| pN stage                     | 0      | 29(14.3)       | 17(12.9)      | 12(16.9)     | .435     |
|                              | 1/2    | 174(85.7)      | 115(87.1)     | 59(83.1)     |          |
| pM stage                     | 0      | 130(98.5)      | 98(98.0)      | 32(100.0)    | 1.000    |
|                              | 1      | 2(1.5)         | 2(2.0)        | 0            |          |
| pTNM stage                   | I      | 18(8.8)        | 9(6.8)        | 9(12.7)      | .161     |
|                              | II-IV  | 185(91.2)      | 123(93.2)     | 62(87.3)     |          |
| Laterality                   | Right  | 45(22.2)       | 29(22.0)      | 16(22.5)     | .926     |
|                              | Left   | 158(77.8)      | 103(78.0)     | 55(77.5)     |          |

Abbreviations: FEV<sub>1</sub>= forced expiratory volume in 1s, DLCO= diffusion capacity of lung for carbon monoxide, Neo-ACT=neoadjuvant chemotherapy, SCC=squamous cell carcinoma, ADE=adenocarcinoma,  $\chi^2$  test was calculated from logistic regression model stratified by trail. *P* value is for the comparison between Open and VATS group.

**Supplementary Table S3.** Clinical characteristics and perioperative outcomes between right and left pneumonectomy via Open or VATS approach

| Characteristic            | Open        |             |          | VATS       |             |          |
|---------------------------|-------------|-------------|----------|------------|-------------|----------|
|                           | Right n=77  | Left n=401  | <i>p</i> | Right n=24 | Left n=61   | <i>p</i> |
| pT Stage                  |             |             | .218     |            |             | .329     |
| I/II                      | 35(45.5)    | 213(53.1)   |          | 13(54.2)   | 40(65.5)    |          |
| III/IV                    | 42(54.5)    | 188(46.9)   |          | 11(45.8)   | 21(34.4)    |          |
| Operative time, min       | 156.5±46.0  | 136.9±45.5  | .001     | 209.6±59.7 | 188.6±73.7  | .217     |
| Blood loss, ml            | 261.0±350.2 | 212.6±236.0 | .131     | 177.1±95.5 | 234.4±258.9 | .226     |
| Number of dissected LN    | 18.0±7.7    | 16.8±7.0    | .147     | 17.9±5.5   | 18.2±9.2    | .857     |
| R0 Surgery, %             | 63(81.8)    | 376(93.8)   | .000     | 22(91.7)   | 57(93.4)    | .774     |
| Major complications, %    | 19(24.7)    | 67(16.7)    | .096     | 5(20.8)    | 5(8.2)      | .104     |
| Atrial Fibrillation       | 4(5.2)      | 38(9.5)     |          | 1(4.1)     | 2(3.3)      |          |
| Bleeding                  | 5(6.5)      | 6(1.5)      |          | 0          | 1(1.6)      |          |
| ARDS                      | 1(1.3)      | 9(2.2)      |          | 0          | 0           |          |
| Infection                 | 2(2.6)      | 7(1.7)      |          | 0          | 2(3.3)      |          |
| Bronchopleural Fistula    | 5(6.5)      | 3(0.7)      | .002     | 4(16.7)    | 0           | .005     |
| Chylothorax               | 1(1.3)      | 2(0.5)      |          | 0          | 0           |          |
| Esophageal injury         | 0           | 1(0.2)      |          | 0          | 0           |          |
| Gastrointestinal bleeding | 1(1.3)      | 1(0.2)      |          | 0          | 0           |          |
| Days in ICU               | 2.9±2.6     | 3.0±4.3     | .922     | 4.7±8.4    | 2.2±1.9     | .172     |
| LOS, day                  | 12.4±8.4    | 11.6±9.4    | .511     | 10.8±7.4   | 10.0±4.8    | .672     |
| 30 days mortality, %      | 3(3.9)      | 6(1.5)      | .336     | 1(4.2)     | 1(1.6)      | 1.000    |
| 90 days mortality, %      | 3(3.9)      | 8(2.0)      | .546     | 2(8.3)     | 1(1.6)      | .394     |

Abbreviations: LN=lymph node, LOS=length of stay. Categorical data are expressed as number (%) and continuous data as mean ± SD or median (interquartile range)
